# Supplementary material for: Characterization of Culturable Bacterial Communities in Permafrost, Moraine, and Rhizosphere Soils near the Ecology Glacier (King George Island, Maritime Antarctica): Patterns of Antibiotic Resistance and Virulence Factors in Isolated Bacteria
Source: Research Square preprint supplement (doi:10.21203/rs.3.rs-6667169/v1), 2025-06-20
Supplement: Supplementary file 1 [file 50c1cec8691b379bcfafd485.docx]

|  | **Samples** | **Genus+** | **R stat** | **p-value** |
| --- | --- | --- | --- | --- |
| In situ | M | *Janthinobacterium* | 0.843 | 0.006** |
| M | *Oxalobacteraceae family* | 0.837 | 0.007** |
| M | *Pseudomonas* | 0.824 | 0.007** |
| M | *Polaromonas* | 0.796 | 0.007** |
| M | *Microbacteriaceae family* | 0.775 | 0.007** |
| M | *Norcadioides* | 0.775 | 0.010* |
| P | *Flavobacterium* | 0.755 | 0.006** |
| R | *Microbacterium* | 0.75 | 0.006** |
| R | *Sphingomonadeceace family* | 0.72 | 0.007** |
| R | *Pedobacter* | 0.712 | 0.007** |
| R | *Rhizobiaceae family* | 0.707 | 0.007* |
| R | *Arthrobacter* | 0.707 | 0.006** |
| Plate | M | *Sphingobacterium* | 0.814 | 0.006** |
| M | *Brevibacterium* | 0.796 | 0.007** |
| M | *Bacillus* | 0.755 | 0.007** |
| M | *Achomobacter* | 0.75 | 0.007** |
| P | *Micrococaceae family* | 0.72 | 0.007** |
| P | *Pseudomonas* | 0.712 | 0.010* |
| P | *Janthinobacterium* | 0.707 | 0.006** |
| P | *Novosphingobium* | 0.707 | 0.007** |
| P | *Mucilaginibacter* | 0.814 | 0.006** |
| R | *Rhizobiaceae family* | 0.796 | 0.007** |
| R | *Pedobacter* | 0.755 | 0.018* |
| R | *Stenotrophomonas* | 0.75 | 0.007** |
| R | *Microbacteriaceae family* | 0.72 | 0.007* |
| R | *Sphingomonadaceae family* | 0.712 | 0.006** |
| R | *Lysobacter* | 0.707 | 0.007** |
| R | *Atrthrobacter* | 0.707 | 0.006** |

**Table S2.** Microbial indicators (genus level) in lawns from permafrost (P), moraine (M), and rhizosphere (R) soils collection recovery by in situ and plate methods.
