# Supplementary material for: Characterization of Culturable Bacterial Communities in Permafrost, Moraine, and Rhizosphere Soils near the Ecology Glacier (King George Island, Maritime Antarctica): Patterns of Antibiotic Resistance and Virulence Factors in Isolated Bacteria
Source: Research Square preprint supplement (doi:10.21203/rs.3.rs-6667169/v1), 2025-06-20
Supplement: Supplementary file 2 [file cc25d3751bc7a07010ef27e1.docx]

**Table S1**. Pearson’s correlation among bacterial abundances, and physical (pH and EC) and chemical (TP, POlsen, TC, OM, TN, Ca+2, Mg+, Na+, K+, and Fe2+) properties of Antarctic soils.
